# Supplementary material for: Visualizing the distribution of curcumin in the root of Curcuma longa via VUV-postionization mass spectrometric imaging
Source: Royal Society of Chemistry journal article supplement (doi:10.1039/d2an01516a), 2022-11-18
Supplement: d2an01516a1.pdf [file d2an01516a1.pdf]

## Electronic Supplementary Information

# Visualizing the Distribution of Curcumin in the Root of *Curcuma Longa* via VUV-postionization Mass Spectrometric Imaging

Wuyi Nie<sup>a</sup>, Qiao Lu<sup>b\*</sup>, Tao Hu<sup>a</sup>, Min Xie<sup>a</sup>, Yongjun Hu<sup>a\*</sup>

<sup>a</sup> MOE Key Laboratory of Laser Life Science & Institute of Laser Life Science, Guangdong Provincial Key Laboratory of Laser Life Science, Guangzhou Key Laboratory of Spectral Analysis and Functional Probes, College of Biophotonics, South China Normal University, Guangzhou 510631, China

<sup>b</sup> Department of Laboratory Medicine, Taihe Hospital, Hubei University of Medicine, Shiyan 442000, China

\*Email: [yjhu@scnu.edu.cn](mailto:yjhu@scnu.edu.cn) (Prof. Yongjun Hu); [luqiaomail@126.com](mailto:luqiaomail@126.com) (Dr. Qiao Lu)

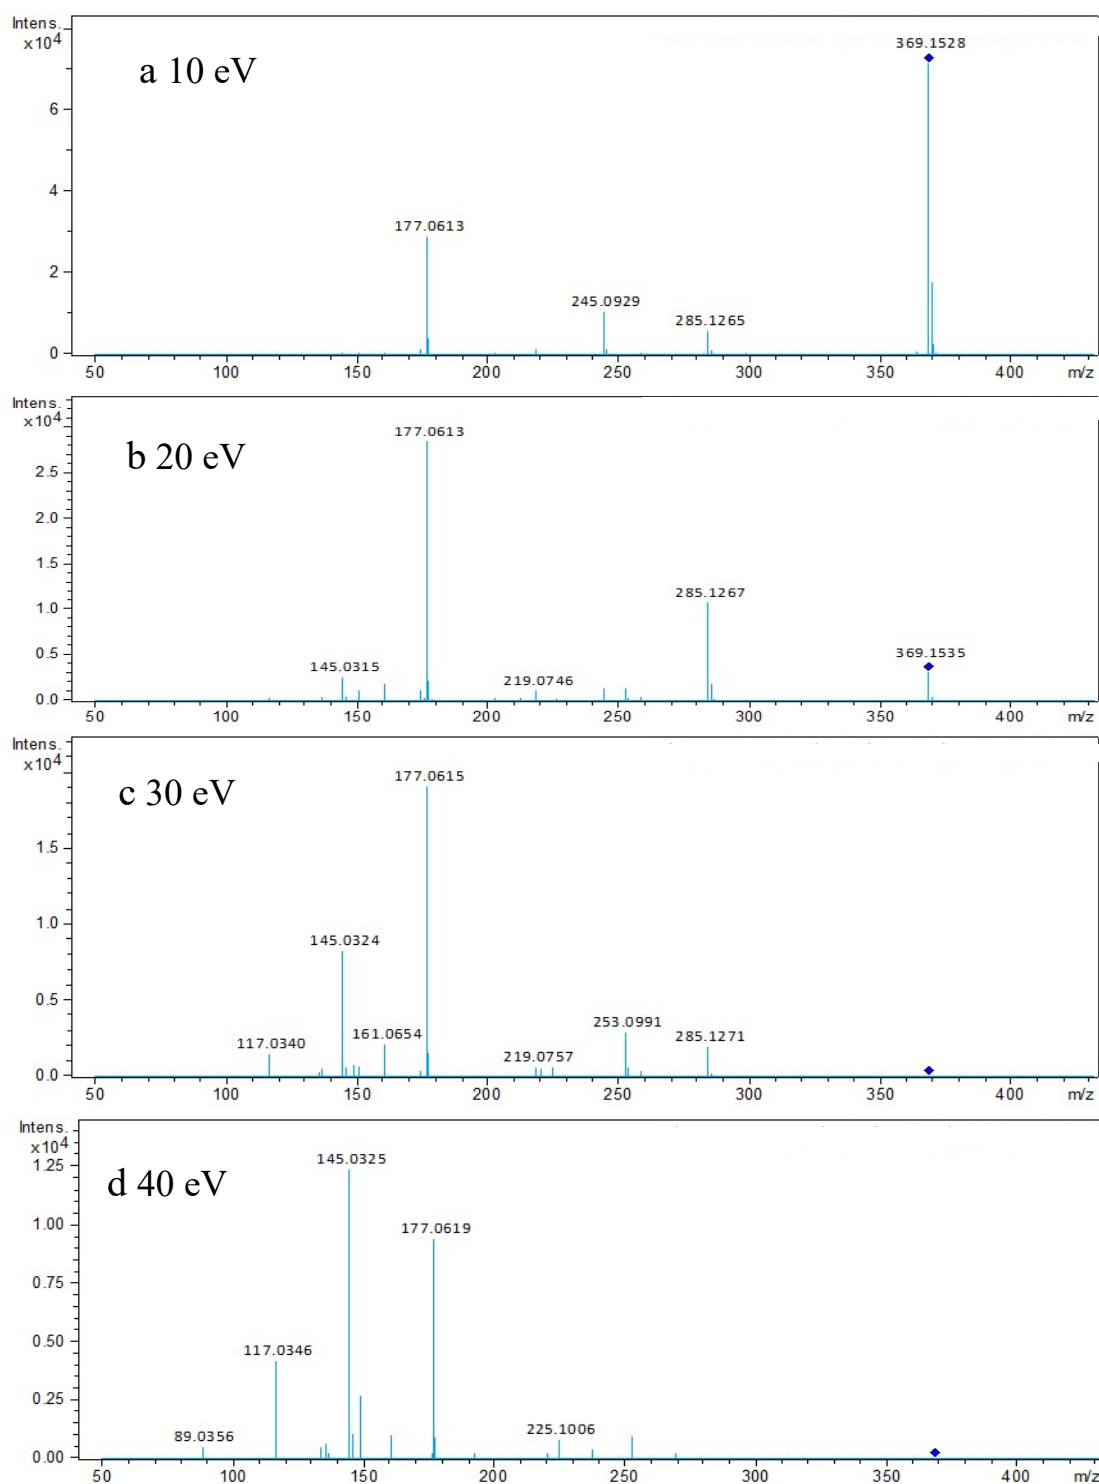

Fig. S-1. a-d show the mass spectral of curcumin obtained by a Q-TOF-MS with collision energy of 10-40 eV respectively.

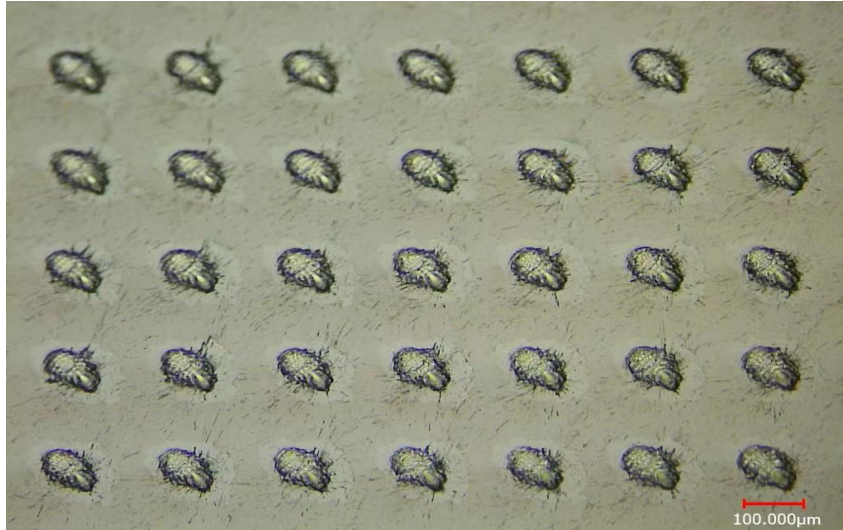

Fig. S-2. Optical microscopy image of the craters on a silicon wafer after laser ablation.

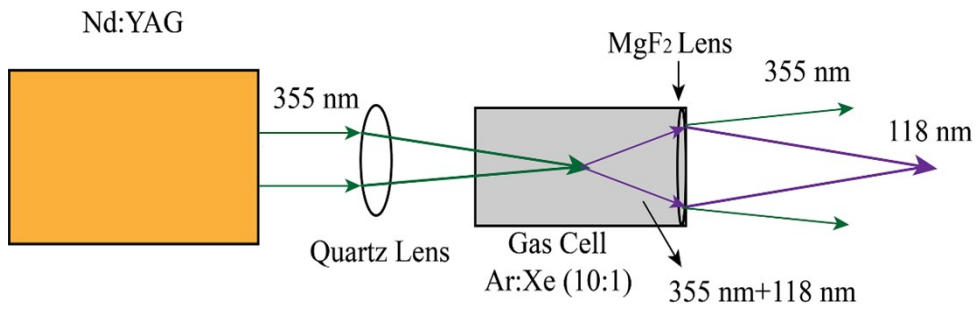

Fig. S-3. The schematic diagram of VUV generation.
